# Supplementary material for: Chemical Compounds from Female and Male Rectal Pheromone Glands of the Guava Fruit Fly, Bactrocera correcta
Source: PubMed Central journal article supplement (PMC6468847; doi:10.3390/insects10030078), 2019-03-18
Supplement: insects-10-00078-s001.pdf [file insects-10-00078-s001.pdf]

Table S1. Chemical compounds identified by GC-MS in rectal glands of *B. correcta* females and males at different ages.

| Age<br>(day-olds) | Insect | Amounts (ng/gland) |               |                 |                 |                |                  |                |               |               |              |
|-------------------|--------|--------------------|---------------|-----------------|-----------------|----------------|------------------|----------------|---------------|---------------|--------------|
|                   |        | A                  | B             | C               | D               | E              | F                | G              | H             | I             | J            |
| 5                 | F      | -                  | -             | 148.03 ± 61.23  | 108.4 ± 40.54   | 46.12 ± 13.39  | 171.79 ± 61.50   | 68.58 ± 20.70  | 28.63 ± 6.88  | -             | -            |
|                   | M      | -                  | 32.60 ± 13.89 | -               | -               | 23.70 (1)      | 31.30 ± 6.63     | 46.27 ± 12.55  | 48.96 (1)     | 21.44 (1)     | 48.72 ± 2.94 |
| 10                | F      | -                  | 44.72 ± 23.19 | 599.59±265.67   | 362.47±125.50   | 154.66±42.45   | 459.91 ± 113.97  | 145.93 ± 27.37 | 43.52 ± 6.60  | 40.16 ± 24.13 | -            |
|                   | M      | -                  | -             | -               | -               | -              | 17.53 (1)        | -              | -             | 48.69 (1)     | 49.07 (1)    |
| 13                | F      | -                  | -             | 558.99 ± 282.38 | 365.92 ± 184.06 | 140.19 ± 65.92 | 441.31 ± 229.29  | 149.92 ± 67.74 | 38.88 ± 14.07 | 29.13±9.61    | -            |
|                   | M      | 15.69 (1)          | -             | -               | 13.62 (1)       | -              | 25.53 (1)        | -              | 20.04 (1)     | 41.10 (1)     | 20.56 (1)    |
| 15                | F      | -                  | 33.80 ± 4.28  | 518.14 ± 62.91  | 323.84 ± 19.28  | 123.76 ± 8.18  | 353.33 ± 20.10   | 85.56 ± 17.54  | 29.80 ± 0.79  | -             | -            |
|                   | M      | -                  | -             | -               | 25.13 (1)       | 31.56 (1)      | 66.66 ± 3.48 (1) | -              | 57.32 ± 30.15 | 27.44 (1)     | -            |
| 17                | F      | 30.59 ± 0.01       | 58.20 ± 26.66 | 455.88 ± 120.80 | 254.81 ± 68.68  | 92.14 ± 7.58   | 259.67 ± 53.02   | 86.65 ± 4.09   | 39.33 ± 9.21  | -             | -            |
|                   | M      | -                  | -             | -               | -               | -              | 28.17 (1)        | -              | 23.61 (1)     | 11.05 (1)     | -            |
| 20                | F      | -                  | -             | 153.34 ± 45.86  | 104.08 ± 15.58  | 47.01 ± 6.02   | 117.28 ± 12.80   | 40.81 ± 3.10   | -             | -             | -            |
|                   | M      | -                  | -             | -               | -               | -              | -                | -              | -             | -             | -            |
| 22                | F      | -                  | -             | 347.54 ± 78.30  | 264.31 ± 28.82  | 126.29 ± 13.40 | 320.07 ± 15.62   | 88.67 ± 1.30   | 34.55 ± 3.76  | 33.18 ± 3.61  | 33.97 ± 8.50 |
|                   | M      | -                  | -             | -               | 14.27 (1)       | -              | 16.42 (1)        | -              | -             | -             | -            |
| 25                | F      | -                  | -             | 590.02 ± 429.96 | 447.40 ± 306.55 | 176.46 ± 95.33 | 557.92 ± 361.53  | 108.76 ± 45.16 | 39.97 ± 4.70  | -             | -            |
|                   | M      | 9.26 (1)           | -             | -               | -               | -              | 14.09 (1)        | -              | -             | -             | -            |
| 27                | F      | -                  | -             | 135.91 ± 54.86  | 100.45 ± 31.63  | 55.33 ± 15.60  | 121.48 ± 34.76   | 37.46 ± 6.24   | 14.61 ± 1.90  | -             | -            |
|                   | M      | -                  | -             | -               | -               | -              | -                | -              | -             | -             | -            |
| 30                | F      | -                  | 35.38 ± 7.30  | 544.05 ± 185.17 | 280.62 ± 73.71  | 105.41 ± 22.66 | 268.70 ± 51.32   | 84.68 ± 22.11  | 30.09 ± 4.39  | -             | -            |
|                   | M      | -                  | -             | -               | -               | -              | 14.08 (1)        | -              | -             | -             | -            |
| 35                | F      | -                  | -             | 1536.94 ±       | 694.27 ± 196.44 | 298.24 ± 71.57 | 613.25 ± 172.84  | 193.19 ± 63.17 | 45.00 ± 8.38  | 39.68 ± 5.32  | 41.35 ± 6.79 |
|                   | M      | 9.26 (1)           | -             | 466.55          | -               | -              | -                | -              | -             | -             | -            |

|    |   |              |           |                 |                 |                |                 |                |              |               |               |
|----|---|--------------|-----------|-----------------|-----------------|----------------|-----------------|----------------|--------------|---------------|---------------|
|    |   |              |           | -               |                 |                |                 |                |              |               |               |
| 40 | F | -            | -         | 666.30 ± 318.56 | 419.66 ± 153.49 | 250.78 ± 97.07 | 448.72 ± 173.74 | 152.30 ± 54.96 | 46.37 ± 9.86 | 43.23 ± 11.11 | 43.92 ± 18.04 |
|    | M | 22.97 ± 0.20 | 43.78 (1) | -               | -               | 25.76 (1)      | -               | -              | -            | -             | -             |

F females; M males. A octanal; B N-(3-methylbutyl) acetamide; C ethyl dodecanoate; D ethyl tetradecanoate; E ethyl (*E*)-9-hexadecenoate; F ethyl hexadecanoate; G ethyl (*Z*)-9-octadecenoate; H ethyl octadecanoate; I (*Z*)-9-tricosene and J ethyl eicosanoate. Number 1 in parentheses represents only one of three replicates where the compound was detected.
